# Supplementary material
Source: publisher figshare collection journal article supplement (https://gsajournals.figshare.com/articles/dataset/_/12151725)

**Value of BIC  
versus number of clusters**

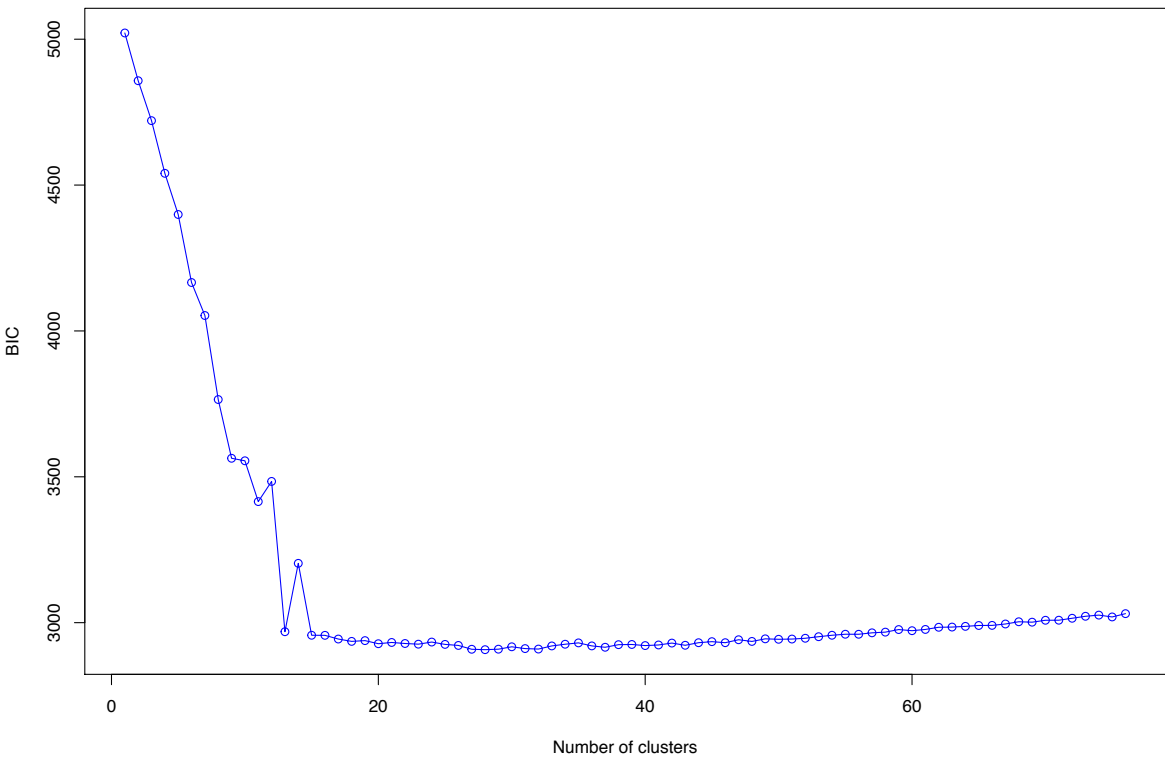

Supplement: Supplementary file 1 [file 1]

# DAPC Cross-Validation

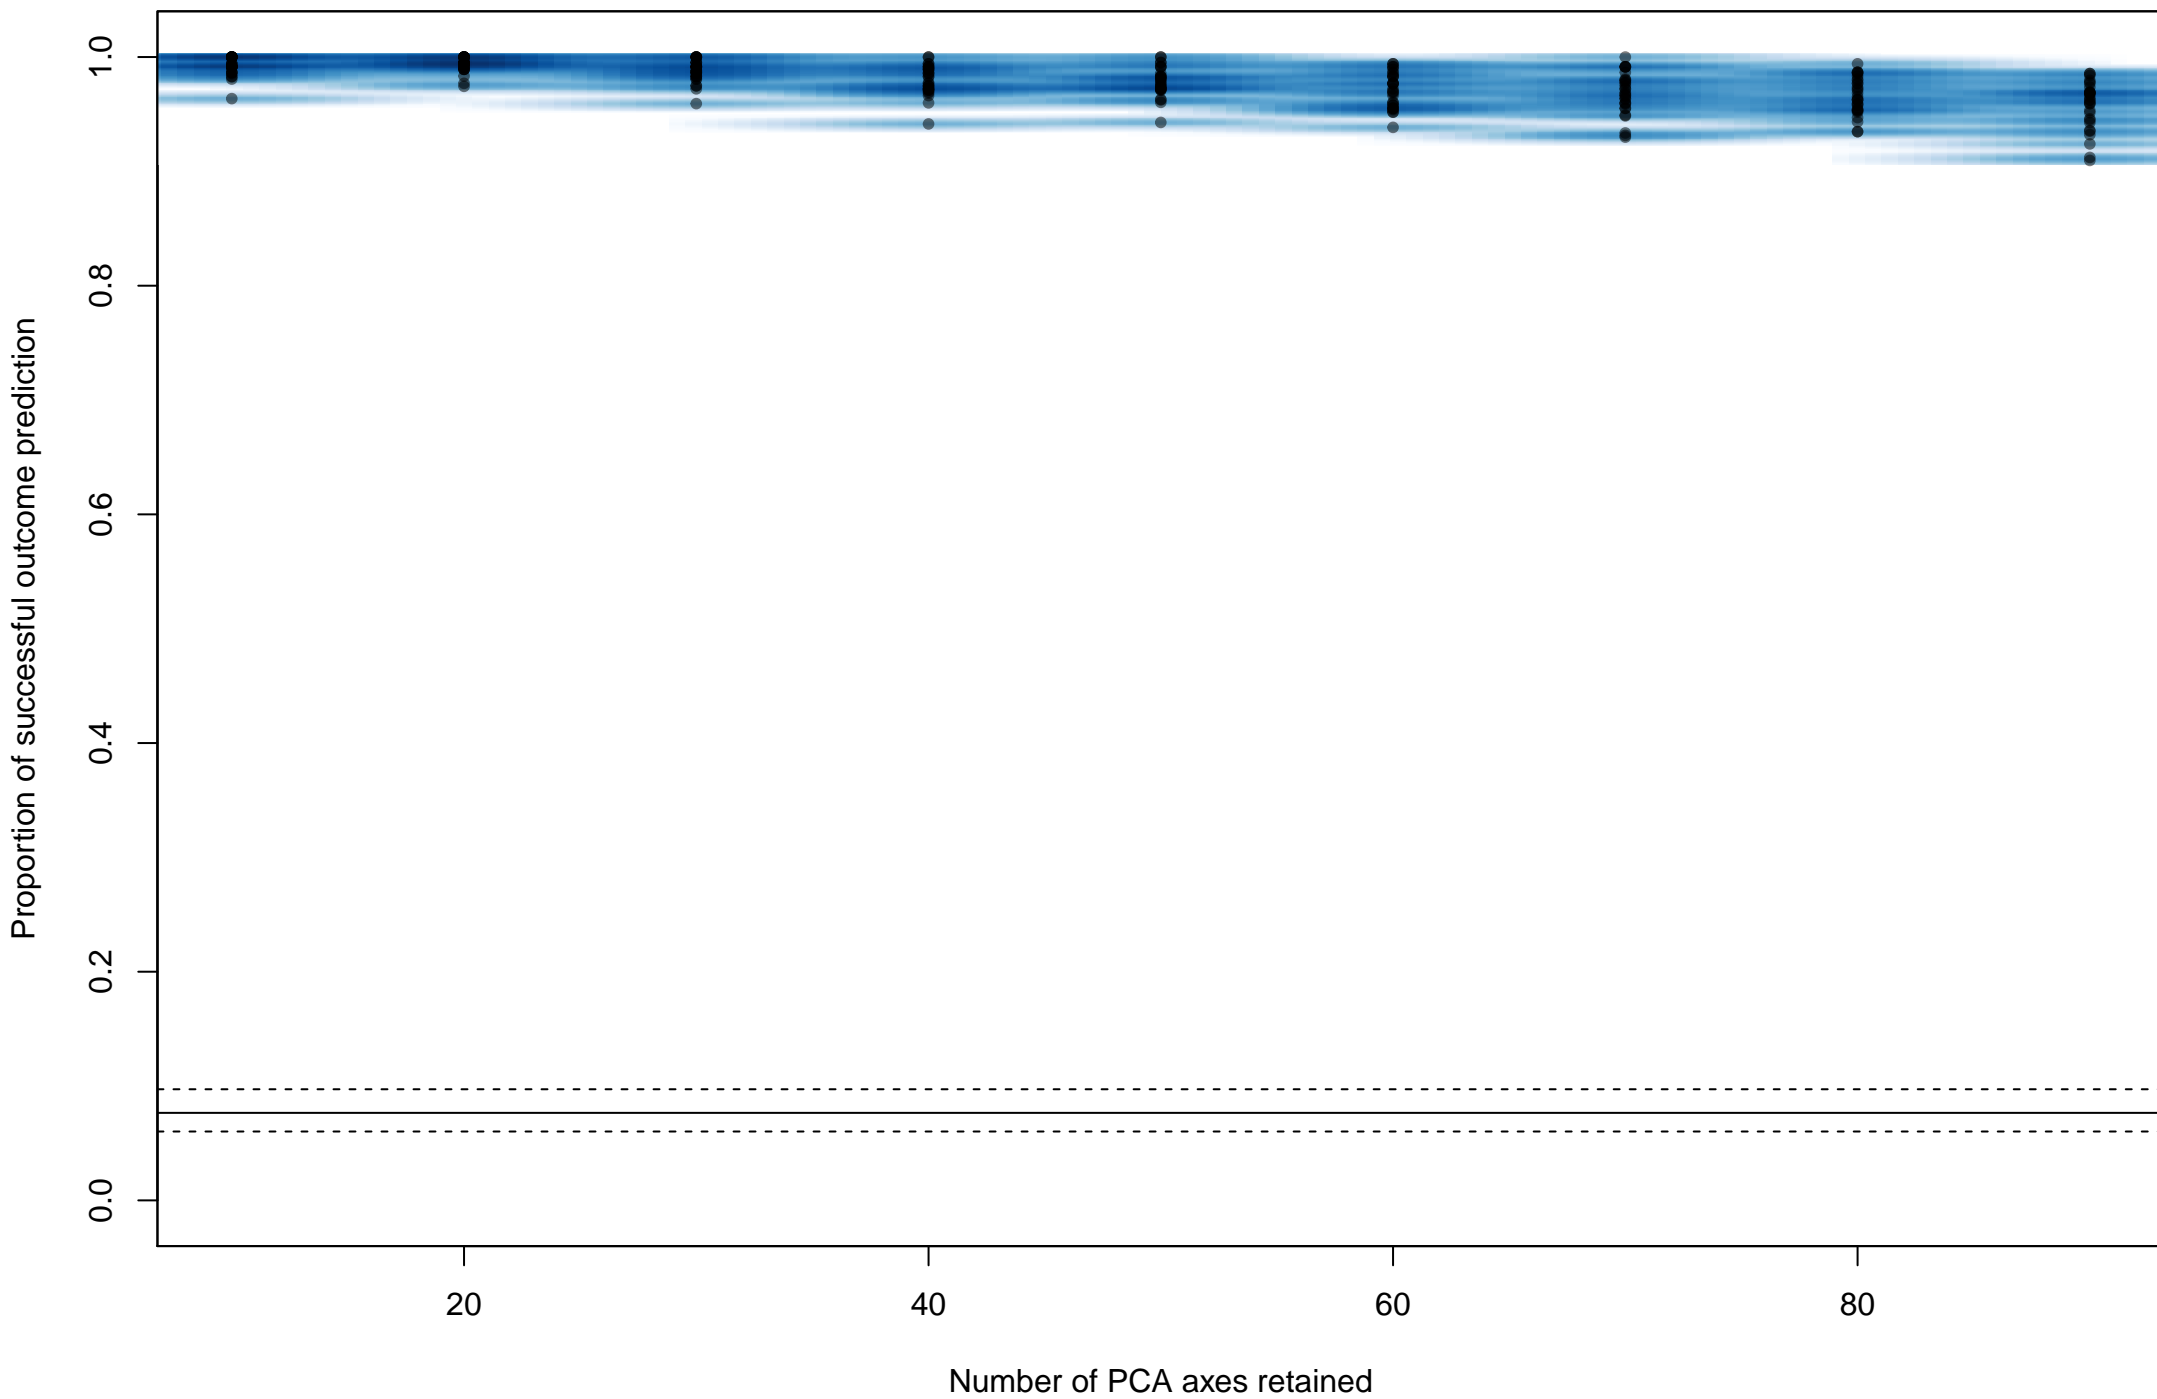

Supplement: Supplementary file 2 [file 1]
